# Supplementary material
Source: ML conference proceedings conference paper supplement (https://openreview.net/forum?id=uMNWbpIQP26)
Supplement: supplementary_material [file attachment]

## APPENDIX

## A PROOF OF LEMMA 1

We restate the lemma below.

**Lemma.** *If  $f : \mathbb{R}^d \rightarrow \mathbb{R}$  is  $\mu$ -PL\*,  $L$ -smooth and  $f(x) \geq 0$  for all  $x \in \mathbb{R}^d$ , then gradient descent with learning rate  $\eta < \frac{2}{L}$  converges linearly to  $x^*$  satisfying  $f(x^*) = 0$ .*

*Proof.* The proof follows exactly from Theorem 1 of Karimi et al. (2016). Since  $f$  is  $L$ -smooth, by Lemma 2a it holds that:

$$\begin{aligned} f(w^{(t+1)}) - f(w^{(t)}) &\leq \langle \nabla f(w^{(t)}), w^{(t+1)} - w^{(t)} \rangle + \frac{L}{2} \|w^{(t+1)} - w^{(t)}\|^2. \\ \implies f(w^{(t+1)}) - f(w^{(t)}) &\leq -\eta \|\nabla f(w^{(t)})\|^2 + \frac{L}{2} \eta^2 \|\nabla f(w^{(t)})\|^2 \\ \implies f(w^{(t+1)}) - f(w^{(t)}) &\leq \left( -\eta + \frac{\eta^2 L}{2} \right) 2\mu f(w^{(t)}) \\ \implies f(w^{(t+1)}) &\leq (1 - 2\mu\eta + \mu\eta^2 L) f(w^{(t)}) \end{aligned}$$

Hence, if  $\eta < \frac{2}{L}$ , then  $C = (1 - 2\mu\eta + \mu\eta^2 L) < 1$ . Thus, we have  $f(w^{(t+1)}) \leq C f(w^{(t)})$  for  $C < 1$ . Thus, as  $f$  is bounded below by 0 and the sequence  $\{f(w^{(t)})\}_{t \in \mathbb{N}}$  monotonically decreases with infimum 0, the monotone convergence theorem implies  $\lim_{t \rightarrow \infty} f(w^{(t)}) = 0$ .  $\square$

## B PROOF OF LEMMA 3

*Proof.* From Lemma 2 and from the PL condition, we have:

$$2\mu(f(x) - f(x^*)) \leq \|\nabla f(x)\|^2 \leq 2L(f(x) - f(x^*)) \implies \mu \leq L \quad \square$$

## C PROOF OF THEOREM 1

*Proof.* Since  $f$  is  $L$ -smooth, by Lemma 2a it holds that:

$$f(w^{(t+1)}) - f(w^{(t)}) \leq \langle \nabla f(w^{(t)}), w^{(t+1)} - w^{(t)} \rangle + \frac{L}{2} \|w^{(t+1)} - w^{(t)}\|^2. \quad (5)$$

Now by the condition on  $\phi^{(t)}$  in Theorem 1, we bound the first term on the right as follows:

$$\begin{aligned} \langle \phi^{(t)}(w^{(t+1)}) - \phi^{(t)}(w^{(t)}), w^{(t+1)} - w^{(t)} \rangle &\geq \alpha_l^{(t)} \|w^{(t+1)} - w^{(t)}\|^2 \\ \implies \langle -\eta \nabla f(w^{(t)}), w^{(t+1)} - w^{(t)} \rangle &\geq \alpha_l^{(t)} \|w^{(t+1)} - w^{(t)}\|^2 \text{ using Equation (2)} \\ \implies \langle \nabla f(w^{(t)}), w^{(t+1)} - w^{(t)} \rangle &\leq -\frac{\alpha_l^{(t)}}{\eta} \|w^{(t+1)} - w^{(t)}\|^2. \end{aligned}$$

Substituting this bound back into the inequality in (5), we obtain

$$f(w^{(t+1)}) - f(w^{(t)}) \leq \left( -\frac{\alpha_l^{(t)}}{\eta} + \frac{L}{2} \right) \|w^{(t+1)} - w^{(t)}\|^2.$$

Since the learning rate is selected so that the coefficient of  $\|w^{(t+1)} - w^{(t)}\|^2$  on the right is negative, we obtain

$$\begin{aligned}
f(w^{(t+1)}) - f(w^{(t)}) &\leq \left(-\frac{\alpha_l^{(t)}}{\eta} + \frac{L}{2}\right) \|w^{(t+1)} - w^{(t)}\|^2 \\
&\leq \left(-\frac{\alpha_l^{(t)}}{\eta} + \frac{L}{2}\right) \frac{1}{\alpha_u^{(t)^2}} \|\phi^{(t)}(w^{(t+1)}) - \phi^{(t)}(w^{(t)})\|^2 \\
&= \left(-\frac{\alpha_l^{(t)}}{\eta} + \frac{L}{2}\right) \frac{1}{\alpha_u^{(t)^2}} \|\eta \nabla f(w^{(t)})\|^2 \text{ using Equation (1)} \\
&\leq \left(-\frac{\alpha_l^{(t)}}{\eta} + \frac{L}{2}\right) 2\mu \frac{\eta^2}{\alpha_u^{(t)^2}} (f(w^{(t)}) - f(w^*)) \text{ as } f \text{ is } \mu\text{-PL} \\
\Rightarrow f(w^{(t+1)}) - f(w^*) &\leq \left(1 - 2\mu \frac{\eta \alpha_l^{(t)}}{\alpha_u^{(t)^2}} + \mu \frac{L \eta^2}{\alpha_u^{(t)^2}}\right) (f(w^{(t)}) - f(w^*)),
\end{aligned}$$

where the second inequality follows since  $\phi^{(t)}$  is  $\alpha_u^{(t)}$ -Lipschitz. For linear convergence, we need.

$$0 < 1 - 2\mu \frac{\eta \alpha_l^{(t)}}{\alpha_u^{(t)^2}} + \mu \frac{L \eta^2}{\alpha_u^{(t)^2}} < 1. \quad (6)$$

From Lemma 3,  $\mu < \frac{\alpha_u^{(t)^2} L}{\alpha_l^{(t)}}$  always holds and implies that the left inequality in (6) is satisfied for all  $\eta^{(t)}$ . The right inequality holds by our assumption that  $\eta^{(t)} < \frac{2\alpha_l^{(t)}}{L}$ , which completes the proof.  $\square$

## D PROOF OF THEOREM 2

We repeat the theorem below for convenience.

**Theorem.** Suppose  $f : \mathbb{R}^d \rightarrow \mathbb{R}$  is  $L$ -smooth and  $\mu$ -PL and  $\phi : \mathbb{R}^d \rightarrow \mathbb{R}^d$  is an infinitely differentiable, analytic function with analytic inverse,  $\phi^{-1}$ . If there exist  $\alpha_l, \alpha_u > 0$  such that:

- (a)  $\alpha_l \mathbf{I} \preceq \mathbf{J}_\phi \preceq \alpha_u \mathbf{I}$ ,
- (b)  $|\partial_{i_1, \dots, i_k} \phi_j^{-1}(x)| \leq \frac{k!}{2\alpha_u d} \forall x \in \mathbb{R}^d, i_1, \dots, i_k \in [d], j \in [d], k \geq 2$ ,

then generalized mirror descent converges linearly for  $\eta^{(t)} < \min\left(\frac{4\alpha_l^2}{5L\alpha_u}, \frac{1}{2\sqrt{d}\|\nabla f(w^{(t)})\|}\right)$ .

*Proof.* Since  $f$  is  $L$ -smooth, it holds by Lemma that 2:

$$f(w^{(t+1)}) - f(w^{(t)}) \leq \langle \nabla f(w^{(t)}), w^{(t+1)} - w^{(t)} \rangle + \frac{L}{2} \|w^{(t+1)} - w^{(t)}\|^2.$$

Next, we want to bound the two quantities on the right hand side by a multiple of  $\|\nabla f(w^{(t)})\|^2$ . We do so by expanding  $w^{(t+1)} - w^{(t)}$  using the Taylor series for  $\phi^{-1}$  as follows:

$$\begin{aligned}
w^{(t+1)} - w^{(t)} &= \phi^{-1}(\phi(w^{(t)}) - \eta \nabla f(w^{(t)})) - w^{(t)} \\
&= -\eta \mathbf{J}_{\phi^{-1}}(\phi(w^{(t)})) \nabla f(w^{(t)}) \\
&\quad + \sum_{k=2}^{\infty} \frac{1}{k!} \left[ \sum_{i_1, i_2, \dots, i_k=1}^d (-\eta)^k \partial_{i_1, \dots, i_k} \phi_j^{-1}(\phi(w^{(t)})) (\nabla f(w^{(t)})_{i_1} \dots \nabla f(w^{(t)})_{i_k}) \right].
\end{aligned}$$

The quantity in brackets is a column vector where we only wrote out the  $j^{th}$  coordinate for  $j \in [d]$ . Now we bound the term  $\langle \nabla f(w^{(t)}), w^{(t+1)} - w^{(t)} \rangle$ :

$$\begin{aligned}
\langle \nabla f(w^{(t)}), w^{(t+1)} - w^{(t)} \rangle &= -\eta \nabla f(w^{(t)})^T \mathbf{J}_{\phi^{-1}}(w^{(t)}) \nabla f(w^{(t)}) \\
&\quad + \nabla f(w^{(t)})^T \sum_{k=2}^{\infty} \frac{1}{k!} \left[ \sum_{i_1, i_2, \dots, i_k=1}^d (-\eta)^k \partial_{i_1, \dots, i_k} \phi_j^{-1}(\phi(w^{(t)})) (\nabla f(w^{(t)})_{i_1} \dots \nabla f(w^{(t)})_{i_k}) \right].
\end{aligned}$$

We have separated the first order term from the other orders because we will bound them separately using conditions (a) and (b) respectively. Namely, we first have:

$$-\eta \nabla f(w^{(t)})^T \mathbf{J}_\phi^{-1}(w^{(t)}) \nabla f(w^{(t)}) \leq -\frac{\eta}{\alpha_u} \|\nabla f(w^{(t)})\|^2.$$

Next, we use the Cauchy-Schwarz inequality on inner products to bound the inner product of  $\nabla f(w^{(t)})$  and the higher order terms. In the following, we use  $\alpha$  to denote  $\frac{1}{2\alpha_u d}$ .

$$\begin{aligned} & \nabla f(w^{(t)})^T \sum_{k=2}^{\infty} \frac{1}{k!} \left[ \sum_{i_1, i_2, \dots, i_k=1}^d (-\eta)^k \partial_{i_1, \dots, i_k} \phi_j^{-1}(\phi(w^{(t)})) (\nabla f(w^{(t)})_{i_1} \dots \nabla f(w^{(t)})_{i_k}) \right] \\ & \leq \|\nabla f(w^{(t)})\| \sum_{k=2}^{\infty} \frac{1}{k!} \left\| \left[ \sum_{i_1, i_2, \dots, i_k=1}^d (-\eta)^k \partial_{i_1, \dots, i_k} \phi_j^{-1}(\phi(w^{(t)})) (\nabla f(w^{(t)})_{i_1} \dots \nabla f(w^{(t)})_{i_k}) \right] \right\| \\ & \leq \|\nabla f(w^{(t)})\| \sum_{k=2}^{\infty} \frac{\alpha k!}{k!} (\eta)^k \left\| \left[ \sum_{i_1, i_2, \dots, i_k=1}^d |\nabla f(w^{(t)})_{i_1}| \dots |\nabla f(w^{(t)})_{i_k}| \right] \right\| \\ & = \|\nabla f(w^{(t)})\| \alpha \sum_{k=2}^{\infty} \sqrt{d} (\eta)^k (|\nabla f(w^{(t)})_1| + \dots + |\nabla f(w^{(t)})_d|)^k \\ & = \|\nabla f(w^{(t)})\| \alpha \sum_{k=2}^{\infty} (\eta)^k \sqrt{d} \left\langle \begin{bmatrix} |\nabla f(w^{(t)})_1| \\ \vdots \\ |\nabla f(w^{(t)})_d| \end{bmatrix}, \mathbf{1} \right\rangle^k \\ & \leq \|\nabla f(w^{(t)})\| \alpha \sum_{k=2}^{\infty} (\eta)^k \sqrt{d} \|\nabla f(w^{(t)})\|^k (\sqrt{d})^k \\ & = \alpha \sum_{k=2}^{\infty} (\sqrt{d})^{k+1} (\eta)^k \|\nabla f(w^{(t)})\|^{k+1} \\ & = \alpha (\sqrt{d})^3 (\eta)^2 \|\nabla f(w^{(t)})\|^3 \sum_{k=0}^{\infty} (\sqrt{d})^k (\eta)^k \|\nabla f(w^{(t)})\|^k = \frac{\alpha (\sqrt{d})^3 (\eta)^2 \|\nabla f(w^{(t)})\|^3}{1 - \sqrt{d} \eta \|\nabla f(w^{(t)})\|}. \end{aligned}$$

Hence we can select  $\eta < \frac{1}{2\sqrt{d} \|\nabla f(w^{(t)})\|}$  such that:

$$\frac{\alpha (\sqrt{d})^3 (\eta)^2 \|\nabla f(w^{(t)})\|^3}{1 - \sqrt{d} \eta \|\nabla f(w^{(t)})\|} \leq \frac{\alpha (\sqrt{d})^3 (\eta)^2 \|\nabla f(w^{(t)})\|^3}{\sqrt{d} \eta \|\nabla f(w^{(t)})\|} = d \alpha \eta \|\nabla f(w^{(t)})\|^2.$$

Thus, we have established the following bound:

$$\langle \nabla f(w^{(t)}), w^{(t+1)} - w^{(t)} \rangle \leq \left( -\frac{\eta}{\alpha_u} + d \alpha \eta \right) \|\nabla f(w^{(t)})\|^2 = \left( -\frac{\eta}{2\alpha_u} \right) \|\nabla f(w^{(t)})\|^2.$$

Proceeding analogously as above, we establish a bound on  $\|w^{(t+1)} - w^{(t)}\|^2$ :

$$\|w^{(t+1)} - w^{(t)}\|^2 \leq \left( \frac{\eta^2}{\alpha_l^2} + \alpha^2 d^2 \eta^2 \right) \|\nabla f(w^{(t)})\|^2 = \left( \frac{\eta^2}{\alpha_l^2} + \frac{\eta^2}{4\alpha_u^2} \right) \|\nabla f(w^{(t)})\|^2.$$

Putting the bounds together we obtain:

$$f(w^{(t+1)}) - f(w^{(t)}) \leq \left( -\frac{\eta}{2\alpha_u} + \frac{L\eta^2}{2\alpha_l^2} + \frac{L\eta^2}{8\alpha_u^2} \right) \|\nabla f(w^{(t)})\|^2.$$

We select our learning rate to make the coefficient of  $\|\nabla f(w^{(t)})\|^2$  negative, and thus by the PL-inequality (4), we have:

$$\begin{aligned} f(w^{(t+1)}) - f(w^{(t)}) & \leq \left( -\frac{\eta}{2\alpha_u} + \frac{L\eta^2}{2\alpha_l^2} + \frac{L\eta^2}{8\alpha_u^2} \right) 2\mu(f(w^{(t)}) - f(w^*)) \\ \implies f(w^{(t+1)}) - f(w^*) & \leq \left( 1 - \frac{\mu\eta}{\alpha_u} + \frac{\mu L\eta^2}{\alpha_l^2} + \frac{\mu L\eta^2}{4\alpha_u^2} \right) (f(w^{(t)}) - f(w^*)). \end{aligned}$$

Hence,  $w^{(t)}$  converges linearly when:

$$0 < 1 - \frac{\mu\eta}{\alpha_u} + \frac{\mu L\eta^2}{\alpha_l^2} + \frac{\mu L\eta^2}{4\alpha_u^2} < 1.$$

To show that the left hand side is true, we analyze when the discriminant is negative. Namely, we have that the left side holds if:

$$\begin{aligned} & \frac{\mu^2}{\alpha_u^2} - \frac{4\mu L}{\alpha_l^2} - \frac{\mu L}{\alpha_u^2} < 0 \\ \implies & \frac{\mu}{\alpha_u^2} < \frac{4L}{\alpha_l^2} + \frac{L}{\alpha_u^2} \\ \implies & \mu < \frac{4L\alpha_u^2}{\alpha_l^2} + L. \end{aligned}$$

Since  $\mu < L$  by Lemma 3, this is always true. The right hand side holds when  $\eta < \frac{4\alpha_l^2}{5L\alpha_u}$ , which holds by the assumption of the theorem, thereby completing the proof.  $\square$

Note that if  $f$  is non-negative and  $\mu$ -PL\*, then we have:

$$\eta^{(t)} \leq \frac{1}{2\sqrt{2Ld}\sqrt{f(w^{(0)})}} \leq \frac{1}{2\sqrt{2Ld}\sqrt{f(w^{(t)})}} \leq \frac{1}{2\sqrt{d}\|\nabla f(w^{(t)})\|}$$

Hence, we can use a fixed learning rate of  $\eta = \min\left(\frac{4\alpha_l^2}{5L\alpha_u}, \frac{1}{2\sqrt{2Ld}\sqrt{f(w^{(0)})}}\right)$  in this setting.

## E CONDITIONS FOR MONOTONICALLY DECREASING GRADIENTS

As discussed in the remarks after Theorem 2, we can provide a fixed learning rate for linear convergence provided that the gradients are monotonically decreasing. As we show below, this requires special conditions on the PL constant,  $\mu$ , and the smoothness constant,  $L$ , for  $f$ .

**Proposition 1.** Suppose  $f : \mathbb{R}^d \rightarrow \mathbb{R}$  is  $L$ -smooth and  $\mu$ -PL and  $\phi : \mathbb{R}^d \rightarrow \mathbb{R}^d$  is an infinitely differentiable, analytic function with analytic inverse,  $\phi^{-1}$ . If there exist  $\alpha_l, \alpha_u > 0$  such that:

- (a)  $\alpha_l \mathbf{I} \preceq \mathbf{J}_\phi \preceq \alpha_u \mathbf{I}$ ,
- (b)  $|\partial_{i_1, \dots, i_k} \phi_j^{-1}(x)| \leq \frac{k!}{2\alpha_u d} \quad \forall x \in \mathbb{R}^d, i_1, \dots, i_k \in [d], j \in [d], k \geq 2$ ,
- (c)  $\frac{\mu}{L} > \frac{4\alpha_u^2 + \alpha_l^2}{4\alpha_u^2 + 2\alpha_l^2}$ ,

then generalized mirror descent converges linearly for any  $\eta < \min\left(\frac{4\alpha_l^2}{5L\alpha_u}, \frac{1}{2\sqrt{d}\|\nabla f(w^{(0)})\|}\right)$ .

*Proof.* Let  $C = 1 - \frac{\mu\eta}{\alpha_u} + \frac{\mu L\eta^2}{\alpha_l^2} + \frac{\mu L\eta^2}{4\alpha_u^2}$ . We follow exactly the proof of Theorem 2 except that at each timestep we need  $C < \frac{\mu}{L}$  (which is less than 1 by Lemma 3) in order for the gradients to converge monotonically since:

$$\begin{aligned} \|\nabla f(w^{(t+1)})\|^2 & \leq 2L(f(w^{(t+1)}) - f(w^*)) \quad \text{See Lemma 2} \\ & \leq 2LC(f(w^{(t)}) - f(w^*)) \\ & \leq \frac{LC}{\mu} \|\nabla f(w^{(t)})\|^2 \quad \text{As } f \text{ is } \mu\text{-PL.} \end{aligned}$$

Hence in order for  $\|\nabla f(w^{(t+1)})\|^2 < \|\nabla f(w^{(t)})\|^2$ , we need  $C < \frac{\mu}{L}$ . Thus, we select our learning rate such that:

$$0 < 1 - \frac{\mu\eta}{\alpha_u} + \frac{\mu L\eta^2}{\alpha_l^2} + \frac{\mu L\eta^2}{4\alpha_u^2} < \frac{\mu}{L}.$$

Now, in order to have a solution to this system, we must ensure that the discriminant of the quadratic equation in  $\eta$  when considering the right hand side inequality is larger than zero. In particular we require:

$$\begin{aligned} & \frac{\mu^2}{\alpha_u^2} - 4 \left(1 - \frac{\mu}{L}\right) \left(\frac{\mu L}{\alpha_l^2} + \frac{\mu L}{4\alpha_u^2}\right) > 0 \\ \implies & \frac{\mu}{L} > \frac{4\alpha_u^2 + \alpha_l^2}{4\alpha_u^2 + 2\alpha_l^2}, \end{aligned}$$

which completes the proof.  $\square$

## F PROOF OF THEOREM 3

We repeat the theorem below for convenience.

**Theorem.** Suppose  $f(x) = \frac{1}{n} \sum_{i=1}^n f_i(x)$  where  $f_i : \mathbb{R}^d \rightarrow \mathbb{R}$  are non-negative,  $L_i$ -smooth functions with  $L = \sup_{i \in [n]} L_i$  and  $f$  is  $\mu$ -PL\*. Let  $\phi : \mathbb{R}^d \rightarrow \mathbb{R}^d$  be an infinitely differentiable, analytic function with analytic inverse,  $\phi^{-1}$ . SGMD is used to minimize  $f$  according to the updates:

$$\phi(w^{(t+1)}) = \phi(w^{(t)}) - \eta^{(t)} \nabla f_{i_t}(w^{(t)}),$$

where  $i_t \in [n]$  is chosen uniformly at random and  $\eta^{(t)}$  is an adaptive step size. If there exist  $\alpha_l, \alpha_u > 0$  such that:

$$\begin{aligned} (a) \quad & \alpha_l \mathbf{I} \preceq \mathbf{J}_\phi \preceq \alpha_u \mathbf{I}, \\ (b) \quad & |\partial_{i_1, \dots, i_k} \phi_j^{-1}(x)| \leq \frac{k! \mu}{2\alpha_u d L} \quad \forall x \in \mathbb{R}^d, i_1, \dots, i_k \in [d], j \in [d], k \geq 2, \end{aligned}$$

then SGMD converges linearly to a global minimum for any  $\eta^{(t)} < \min \left( \frac{4\mu\alpha_l^2}{5L^2\alpha_u}, \frac{1}{2\sqrt{d} \max_i \|\nabla f_i(w^{(t)})\|} \right)$ .

*Proof.* We follow the proof of Theorem 2. Namely, Lemma 4 implies that  $f$  is  $L$ -smooth and hence

$$f(w^{(t+1)}) - f(w^{(t)}) \leq \langle \nabla f(w^{(t)}), w^{(t+1)} - w^{(t)} \rangle + \frac{L}{2} \|w^{(t+1)} - w^{(t)}\|^2.$$

As before, we want to bound the two quantities on the right by  $\|\nabla f(w^{(t)})\|^2$ . Following the bounds from the proof of Theorem 2, provided  $\eta^{(t)} < \frac{1}{2\sqrt{d} \max_i \|\nabla f_i(w^{(t)})\|}$ , we have

$$\begin{aligned} \nabla f(w^{(t)})^T \sum_{k=2}^{\infty} \frac{1}{k!} \left[ \sum_{i_1, i_2, \dots, i_k=1}^d (-\eta)^k \partial_{i_1, \dots, i_k} \phi_j^{-1}(\phi(w^{(t)})) (\nabla f_{i_1}(w^{(t)})_{l_1} \dots \nabla f_{i_k}(w^{(t)})_{l_k}) \right] \\ \leq \frac{\eta^{(t)} \mu}{2\alpha_u L} \|\nabla f(w^{(t)})\| \|\nabla f_{i_t}(w^{(t)})\|. \end{aligned}$$

To remove the dependence of  $\eta^{(t)}$  on  $i_t$ , we take  $\eta^{(t)} < \frac{1}{2\sqrt{d} \max_i \|\nabla f_i(w^{(t)})\|}$ . Since  $f$  is  $\mu$ -PL\* and  $f_i$  is non-negative for all  $i \in [n]$ ,  $\|\nabla f_i(w^{(t)})\| \leq \sqrt{2L f_i(w^{(t)})}$ . Thus, we can take

$$\eta^{(t)} < \frac{1}{2\sqrt{2dLn} \sqrt{f(w^{(t)})}} \leq \frac{1}{2\sqrt{d} \max_i \|\nabla f_i(w^{(t)})\|}$$

This implies the following bounds:

$$\begin{aligned} \langle \nabla f(w^{(t)}), w^{(t+1)} - w^{(t)} \rangle & \leq -\eta^{(t)} \nabla f(w^{(t)})^T \mathbf{J}_\phi^{-1}(w^{(t)}) \nabla f_{i_t}(w^{(t)}) + \left( \frac{\eta^{(t)} \mu}{2\alpha_u L} \right) \|\nabla f(w^{(t)})\| \|\nabla f_{i_t}(w^{(t)})\|, \\ \|w^{(t+1)} - w^{(t)}\|^2 & \leq \left( \frac{\eta^{(t)2}}{\alpha_l^2} + \frac{\eta^{(t)2}}{4\alpha_u^2} \right) \|\nabla f_{i_t}(w^{(t)})\|^2. \end{aligned}$$

Putting the bounds together we obtain:

$$\begin{aligned}
f(w^{(t+1)}) - f(w^{(t)}) &\leq -\eta^{(t)} \nabla f(w^{(t)})^T \mathbf{J}_\phi^{-1}(w^{(t)}) \nabla f_{i_t}(w^{(t)}) + \left( \frac{\eta^{(t)} \mu}{2\alpha_u L} \right) \|\nabla f(w^{(t)})\| \|\nabla f_{i_t}(w^{(t)})\| \\
&\quad + \left( \frac{\eta^{(t)2}}{\alpha_l^2} + \frac{\eta^{(t)2}}{4\alpha_u^2} \right) \|\nabla f_{i_t}(w^{(t)})\|^2 \\
&\leq -\eta^{(t)} \nabla f(w^{(t)})^T \mathbf{J}_\phi^{-1}(w^{(t)}) \nabla f_{i_t}(w^{(t)}) + \left( \frac{\eta^{(t)} \mu}{2\alpha_u L} \right) 2L \sqrt{f(w^{(t)}) f_{i_t}(w^{(t)})} \\
&\quad + \left( \frac{\eta^{(t)2}}{\alpha_l^2} + \frac{\eta^{(t)2}}{4\alpha_u^2} \right) \|\nabla f_{i_t}(w^{(t)})\|^2
\end{aligned}$$

Now taking expectation over  $i_t$ , we obtain

$$\begin{aligned}
\mathbb{E}[f(w^{(t+1)})] - f(w^{(t)}) &\leq \left( -\frac{\eta^{(t)}}{\alpha_u} \right) \|\nabla f(w^{(t)})\|^2 + \left( \frac{\eta^{(t)} \mu}{\alpha_u} \right) \sqrt{f(w^{(t)})} \mathbb{E} \left[ \sqrt{f_{i_t}(w^{(t)})} \right] \\
&\quad + \left( \frac{L\eta^{(t)2}}{2\alpha_l^2} + \frac{L\eta^{(t)2}}{8\alpha_u^2} \right) \mathbb{E}[\|\nabla f_{i_t}(w^{(t)})\|^2] \\
&\leq \left( -\frac{\eta^{(t)}}{\alpha_u} \right) \|\nabla f(w^{(t)})\|^2 + \left( \frac{\eta^{(t)} \mu}{\alpha_u} \right) f(w^{(t)}) \\
&\quad + \left( \frac{L\eta^{(t)2}}{2\alpha_l^2} + \frac{L\eta^{(t)2}}{8\alpha_u^2} \right) \mathbb{E}[\|\nabla f_{i_t}(w^{(t)})\|^2] \\
&\leq \left( -\frac{2\mu\eta^{(t)}}{\alpha_u} \right) f(w^{(t)}) + \left( \frac{\eta^{(t)} \mu}{\alpha_u} \right) f(w^{(t)}) \\
&\quad + \left( \frac{L\eta^{(t)2}}{2\alpha_l^2} + \frac{L\eta^{(t)2}}{8\alpha_u^2} \right) \mathbb{E}[2L(f_{i_t}(w^{(t)}) - f_{i_t}(w^*))] \\
&\leq \left( -\frac{\mu\eta^{(t)}}{\alpha_u} + \frac{L^2\eta^{(t)2}}{\alpha_l^2} + \frac{L^2\eta^{(t)2}}{4\alpha_u^2} \right) (f(w^{(t)})).
\end{aligned}$$

where the second inequality follows from Jensen's inequality and the third inequality follows from Lemma 2. Hence, we have:

$$\mathbb{E}[f(w^{(t+1)})] \leq \left( 1 - \frac{\mu\eta^{(t)}}{\alpha_u} + \frac{L^2\eta^{(t)2}}{\alpha_l^2} + \frac{L^2\eta^{(t)2}}{4\alpha_u^2} \right) (f(w^{(t)})).$$

Now let  $C = \left( -\frac{\mu\eta^{(t)}}{\alpha_u} + \frac{L^2\eta^{(t)2}}{\alpha_l^2} + \frac{L^2\eta^{(t)2}}{4\alpha_u^2} \right)$ . Then taking expectation with respect to  $i_t, i_{t-1}, \dots, i_1$ , yields

$$\begin{aligned}
\mathbb{E}_{i_t, \dots, i_1}[f(w^{(t+1)})] &\leq (1 + C)(\mathbb{E}_{i_t, \dots, i_1}[f(w^{(t)})]) \\
&= (1 + C)(\mathbb{E}_{i_{t-1}, \dots, i_1}[\mathbb{E}_{i_t | i_{t-1}, \dots, i_1}[f(w^{(t)})]]) \\
&= (1 + C)(\mathbb{E}_{i_{t-1}, \dots, i_1}[f(w^{(t)})]).
\end{aligned}$$

Hence, we can proceed inductively to conclude that

$$\mathbb{E}_{i_t, \dots, i_1}[f(w^{(t+1)})] \leq (1 + C)^{t+1}(f(w^{(0)})).$$

Thus if  $0 < 1 + C < 1$ , we establish linear convergence. The left hand side is satisfied since  $\mu < L$ , and the right hand side is satisfied for  $\eta^{(t)} < \frac{4\mu\alpha_l^2}{5L^2\alpha_u}$ , which holds by the theorem's assumption, thereby completing the proof.  $\square$

#### G PROOF OF THEOREM 4

We restate the theorem below.

**Theorem.** Suppose  $\phi : \mathbb{R}^d \rightarrow \mathbb{R}^d$  is an invertible,  $\alpha_u$ -Lipschitz function and that  $f : \mathbb{R}^d \rightarrow \mathbb{R}$  is non-negative,  $L$ -smooth, and  $\mu$ -PL\* on  $\tilde{\mathcal{B}} = \{x ; \phi(x) \in \mathcal{B}(\phi(w^{(0)}), R)\}$  with  $R = \frac{2\sqrt{2L}\sqrt{f(w^{(0)})}\alpha_u^2}{\alpha_l\mu}$ . If for all  $x, y \in \mathbb{R}^d$  there exists  $\alpha_l > 0$  such that

$$\langle \phi(x) - \phi(y), x - y \rangle \geq \alpha_l \|x - y\|^2,$$

then,

- (1) There exists a global minimum  $w^{(\infty)} \in \tilde{\mathcal{B}}$ .
- (2) GMD converges linearly to  $w^{(\infty)}$  for  $\eta = \frac{\alpha_l}{L}$ .
- (3) If  $w^* = \arg \min_{w \in \tilde{\mathcal{B}} ; f(w)=0} \|\phi(w) - \phi(w^{(0)})\|$  then,  $\|\phi(w^*) - \phi(w^{(\infty)})\| \leq 2R$ .

*Proof.* The proof follows from the proofs of Lemma 1, Theorem 1, and Theorem 4.2 from Liu et al. (2020). Namely, we will proceed by strong induction. Let  $\kappa = \frac{L\alpha_u^2}{\mu\alpha_l^2}$ . At timestep 0, we trivially have that  $w^{(0)} \in \tilde{\mathcal{B}}$  and  $f(w^{(0)}) \leq f(w^{(0)})$ . At timestep  $t$ , we assume that  $w^{(0)}, w^{(1)}, \dots, w^{(t)} \in \tilde{\mathcal{B}}$  and that  $f(w^{(i)}) \leq (1 - \kappa^{-1})f(w^{(i-1)})$  for  $i \in [t]$ . Then at timestep  $t + 1$ , from the proofs of Lemma 1 and Theorem 1, we have:

$$f(w^{(t+1)}) \leq (1 - \kappa^{-1})f(w^{(t)})$$

Next, we need to show that  $w^{(t+1)} \in \tilde{\mathcal{B}}$ . We have that:

$$\begin{aligned} \|\phi(w^{(t+1)}) - \phi(w^{(0)})\| &= \left\| \sum_{i=0}^t -\eta \nabla f(w^{(i)}) \right\| \\ &\leq \eta \sum_{i=0}^t \|\nabla f(w^{(i)})\| \quad \text{By the Triangle Inequality} \\ &\leq \eta \sqrt{2 \frac{L\alpha_u^2}{\alpha_l^2}} \sum_{i=0}^t \sqrt{f(w^{(i)}) - f(w^{(t+1)})} \\ &\leq \eta \sqrt{2 \frac{L\alpha_u^2}{\alpha_l^2}} \sum_{i=0}^t \sqrt{f(w^{(i)})} \\ &\leq \eta \sqrt{2L} \frac{\alpha_u}{\alpha_l} \sum_{i=0}^t \sqrt{(1 - \kappa^{-1})^i} \sqrt{f(w^{(0)})} \\ &= \eta \sqrt{2Lf(w^{(0)})} \frac{\alpha_u}{\alpha_l} \sum_{i=0}^t (1 - \kappa^{-1})^{\frac{i}{2}} \\ &\leq \eta \sqrt{2Lf(w^{(0)})} \frac{\alpha_u}{\alpha_l} \frac{1}{1 - \sqrt{1 - \kappa^{-1}}} \\ &\leq \eta \sqrt{2Lf(w^{(0)})} \frac{\alpha_u}{\alpha_l} \frac{2}{\kappa^{-1}} \\ &= \frac{\alpha_l}{L} \sqrt{2Lf(w^{(0)})} \frac{\alpha_u}{\alpha_l} 2 \frac{\alpha_u L}{\alpha_l \mu} \\ &= \frac{2\sqrt{2L}\sqrt{f(w^{(0)})}\alpha_u^2}{\alpha_l \mu} = R \end{aligned} \tag{7}$$

The identity in (7) follows from the proof of  $f(w^{(t+1)}) \leq (1 - \kappa^{-1})f(w^{(t)})$ . Namely,

$$\begin{aligned} f(w^{(t+1)}) - f(w^{(t)}) &\leq -\frac{L}{2\alpha_u^2} \|\eta \nabla f(w^{(t)})\|^2 \\ \implies \|\nabla f(w^{(t)})\| &\leq \sqrt{\frac{2\alpha_u^2}{L}} \sqrt{f(w^{(t)}) - f(w^{(t+1)})} \\ \implies \|\nabla f(w^{(t)})\| &\leq \eta \sqrt{\frac{2L\alpha_u^2}{\alpha_l^2}} \sqrt{f(w^{(t)}) - f(w^{(t+1)})} \end{aligned}$$

Hence we conclude that  $w^{(t+1)} \in \tilde{\mathcal{B}}$  and so induction is complete.  $\square$

In the case that  $\phi^{(t)}$  is time-dependent, we establish a similar convergence result by assuming that  $\left\| \sum_{i=1}^{\infty} \phi^{(i)}(w^{(i)}) - \phi^{(i-1)}(w^{(i)}) \right\| = \delta < \infty$ . Additionally if  $\alpha_u^{(t)}$  has a uniform upper bound and  $\alpha_l^{(t)}$  has a uniform lower bound, then:

$$\begin{aligned} \|\phi^{(t)}(w^{(t+1)}) - \phi^{(0)}(w^{(0)})\| &= \|\phi^{(t)}(w^{(t+1)}) - \phi^{(t)}(w^{(t)}) + \phi^{(t)}(w^{(t)}) - \phi^{(t-1)}(w^{(t)}) \\ &\quad + \phi^{(t-1)}(w^{(t)}) - \phi^{(t-1)}(w^{(t-1)}) + \dots + \phi^{(0)}(w^{(1)}) - \phi^{(0)}(w^{(0)})\| \\ &\leq \left\| \sum_{i=0}^t \phi^{(i)}(w^{(i+1)}) - \phi^{(i)}(w^{(i)}) \right\| + \left\| \sum_{i=1}^t \phi^{(i)}(w^{(i)}) - \phi^{(i-1)}(w^{(i)}) \right\| \\ &\leq R + \delta \end{aligned}$$

Hence we would conclude that  $\phi^{(t)}(w^{(t+1)}) \in \mathcal{B}(\phi^{(0)}(w^{(0)}), R + \delta)$ .

## H PROOF OF COROLLARY 1 AND COROLLARY 2

We repeat Corollary 1 below.

**Corollary.** Let  $f : \mathbb{R}^d \rightarrow \mathbb{R}$  be an  $L$ -smooth function that is  $\mu$ -PL. Let  $\alpha_l^{(t)^2} = \min_{i \in [d]} \mathcal{G}_{i,i}^{(t)}$  and  $\alpha_u^{(t)^2} = \max_{i \in [d]} \mathcal{G}_{i,i}^{(t)}$ . If  $\lim_{t \rightarrow \infty} \frac{\alpha_l^{(t)}}{\alpha_u^{(t)}} \neq 0$ , then Adagrad converges linearly for adaptive step size  $\eta^{(t)} = \frac{\alpha_l^{(t)}}{L}$ .

*Proof.* By definition of  $\mathcal{G}^{(t)}$ , we have that:

$$\begin{aligned} (1) \quad \alpha_l^{(t)^2} &= \min_{i \in [d]} \mathcal{G}_{i,i}^{(t)} \\ (2) \quad \alpha_u^{(t)^2} &= \max_{i \in [d]} \mathcal{G}_{i,i}^{(t)} \end{aligned}$$

From the proof of Theorem 1, using learning rate  $\eta^{(t)} = \frac{\alpha_l^{(t)}}{L}$  at timestep  $t$  gives:

$$f(w^{(t+1)}) - f(w^*) \leq \left( 1 - \frac{\mu \alpha_l^{(t)^2}}{L \alpha_u^{(t)^2}} \right) (f(w^{(t)}) - f(w^*))$$

Let  $\kappa^{(t)} = \frac{\mu \alpha_l^{(t)^2}}{L \alpha_u^{(t)^2}}$ . Although we have that  $(1 - \kappa^{(t)}) < 1$  for all  $t$ , we need to ensure that  $\prod_{i=0}^{\infty} (1 - \kappa^{(i)}) = 0$  (otherwise we would not get convergence to a global minimum). Using the assumption that  $\lim_{t \rightarrow \infty} \frac{\alpha_l^{(t)}}{\alpha_u^{(t)}} \neq 0$ , let  $\lim_{t \rightarrow \infty} (1 - \kappa^{(t)}) = 1 - c < 1$ . Then using the definition of the limit, for  $0 < \epsilon < c$ , there exists  $N$  such that for  $t > N$ ,  $|\kappa^{(t)} - c| < \epsilon$ . Hence, letting



$c^* = \min \left( c - \epsilon, \min_{t \in \{0, 1, \dots, N\}} \kappa^{(t)} \right)$ , implies that  $(1 - \kappa^{(t)}) < 1 - c^*$  for all timesteps  $t$ . Thus, we have that:

$$\prod_{i=0}^{\infty} (1 - \kappa^{(i)}) < \prod_{i=0}^{\infty} (1 - c^*) = 0$$

Thus, Adagrad converges linearly to a global minimum.  $\square$

We present Corollary 2 below.

**Corollary 2.** *Let  $f : \mathbb{R}^d \rightarrow \mathbb{R}$  be an  $L$ -smooth function that is  $\mu$ -PL. Let  $\alpha_l^{(t)^2} = \min_{i \in [d]} \mathcal{G}_{i,i}^{(t)}$ . Then Adagrad converges linearly for adaptive step size  $\eta^{(t)} = \frac{\alpha_l^{(t)}}{L}$  or fixed step size  $\eta = \frac{\alpha_l^{(0)}}{L}$  if  $\frac{\alpha_l^{(0)^2}}{2L(f(w^{(0)}) - f(w^*))} > \frac{L}{\mu}$ .*

*Proof.* By definition of  $\mathcal{G}^{(t)}$ , we have that:

$$\begin{aligned} (1) \quad \alpha_l^{(t)^2} &= \min_{i \in [d]} \mathcal{G}_{i,i}^{(t)} \\ (2) \quad \alpha_u^{(t)^2} &= \max_{i \in [d]} \mathcal{G}_{i,i}^{(t)} \end{aligned}$$

In particular, we can choose  $\alpha_l = \alpha_l^{(0)}$  uniformly. We need to now ensure that  $\alpha_u^{(t)}$  does not diverge.

We prove this by using strong induction to show that  $\alpha_u^{(t)^2} \leq S$  uniformly for some  $S > 0$ . The base case holds by Lemma 2 since we have:

$$\alpha_u^{(0)^2} \leq \|\nabla f(w^{(0)})\|^2 = S$$

Now assume that  $\alpha_u^{(i)^2} < S$  for  $i \in \{0, 1, \dots, t-1\}$ . Then we have:

$$\begin{aligned} \alpha_u^{(t)^2} &\leq \sum_{i=0}^t \|\nabla f(w^{(i)})\|^2 \\ &\leq \sum_{i=0}^t 2L(f(w^{(i)}) - f(w^*)) \text{ by Lemma 2} \\ &\leq 2L(f(w^{(0)}) - f(w^*)) \sum_{i=0}^{t-1} \prod_{j=0}^i \left( 1 - \frac{\mu \alpha_l^{(j)^2}}{L \alpha_u^{(j)^2}} \right) \\ &\leq 2L(f(w^{(0)}) - f(w^*)) \sum_{i=0}^{t-1} \prod_{j=0}^i \left( 1 - \frac{\mu \alpha_l^{(0)^2}}{LS} \right) \\ &\leq 2L(f(w^{(0)}) - f(w^*)) \frac{1}{1 - 1 + \frac{\mu \alpha_l^{(0)^2}}{LS}} \\ &= 2L(f(w^{(0)}) - f(w^*)) \frac{LS}{\mu \alpha_l^{(0)^2}} < S \text{ by assumption} \end{aligned}$$

Hence, by induction,  $\alpha_u^{(t)}$  is bounded uniformly for all timesteps  $t$ .  $\square$

### I PROOF OF COROLLARY 3

We present the corollary below.

**Corollary 3.** Suppose  $\psi$  is an  $\alpha_l$ -strongly convex function and that  $\nabla\psi$  is  $\alpha_u$ -Lipschitz. Let  $D_\psi(x, y) = \psi(x) - \psi(y) - \nabla\psi(y)^T(x - y)$  denote the Bregman divergence for  $x, y \in \mathbb{R}^d$ . If  $f : \mathbb{R}^d \rightarrow \mathbb{R}$  is non-negative,  $L$ -smooth, and  $\mu$ -PL\* on  $\tilde{\mathcal{B}} = \{x ; \nabla\psi(x) \in \mathcal{B}(\nabla\psi(w^{(0)}), R)\}$  with  $R = \frac{2\sqrt{2L}\sqrt{f(w^{(0)})}\alpha_u^2}{\alpha_l\mu}$ , then:

- (1) There exists a global minimum  $w^{(\infty)} \in \tilde{\mathcal{B}}$  such that  $D_\psi(w^{(\infty)}, w^{(0)}) \leq \frac{R^2}{2\alpha_l}$ .
- (2) Mirror descent with potential  $\psi$  converges linearly to  $w^{(\infty)}$  for  $\eta = \frac{\alpha_l}{L}$ .
- (3) If  $w^* = \arg \min_{\{w ; f(w)=0\}} D_\psi(w, w^{(0)})$ , then  $D(w^*, w^{(\infty)}) \leq \frac{\alpha_u R^2}{\alpha_l^3} + \frac{R^2}{\alpha_l}$ .

*Proof.* The proof of existence and linear convergence follow immediately from Theorem 4. All that remains is to show that  $D_\psi(w^{(\infty)}, w^{(0)}) \leq \frac{R^2}{2\alpha_l}$ . As  $\psi$  is  $\alpha_l$ -strongly convex, we have:

$$\begin{aligned} \psi(w^{(\infty)}) &\leq \psi(w^{(0)}) + \langle \nabla\psi(w^{(0)}), w^{(\infty)} - w^{(0)} \rangle + \frac{1}{2\alpha_l} \|\nabla\psi(w^{(\infty)}) - \nabla\psi(w^{(0)})\|^2 \quad \text{By Lemma 5} \\ \implies D_\psi(w^{(\infty)}, w^{(0)}) &\leq \frac{1}{2\alpha_l} \|\nabla\psi(w^{(\infty)}) - \nabla\psi(w^{(0)})\|^2 \leq \frac{R^2}{2\alpha_l} \end{aligned}$$

Now let  $w^* = \arg \min_{\{w ; f(w)=0\}} D_\psi(w, w^{(0)})$ . Hence  $D_\psi(w^*, w^{(0)}) < \frac{R^2}{2\alpha_l}$  by definition. Then we have:

$$\begin{aligned} D_\psi(w^*, w^{(\infty)}) &\leq \frac{1}{2\alpha_l} \|\nabla\psi(w^*) - \nabla\psi(w^{(\infty)})\|^2 \\ &\leq \frac{1}{2\alpha_l} (2\|\nabla\psi(w^*) - \nabla\psi(w^{(0)})\|^2 + 2\|\nabla\psi(w^{(0)}) - \nabla\psi(w^{(\infty)})\|^2) \\ &\leq \frac{\alpha_u}{\alpha_l} \|w^* - w^{(0)}\|^2 + \frac{R^2}{\alpha_l} \\ &\leq \frac{\alpha_u}{\alpha_l} \frac{2}{\alpha_l} D_\psi(w^*, w^{(0)}) + \frac{R^2}{\alpha_l} \quad \text{By Definition 3} \\ &\leq \frac{\alpha_u R^2}{\alpha_l^3} + \frac{R^2}{\alpha_l} \end{aligned}$$

□

### J EXPERIMENTS ON OVER-PARAMETERIZED NEURAL NETWORKS

Below, we present experiments in which we apply the learning rate given by Corollary 1 to over-parameterized neural networks. Since the main difficulty is estimating the parameter  $L$  in neural networks, we instead provide a crude approximation for  $L$  by setting  $L^{(t)} = .99 \frac{\|\nabla f(w^{(t)})\|^2}{2f(w^{(t)})}$ . The intuition for this approximation comes from Lemma 2. While there are no guarantees that this approximation yields linear convergence according to our theory, Figure 2 suggests empirically that this approximation provides convergence. Moreover, this approximation allows us to compute our adaptive learning rate in practice.

Code for all experiments is available at:

<https://anonymous.4open.science/r/cef30260-473d-4116-bda1-1debdbcc4e00a/>

Convergence of Adagrad in Over-parameterized Neural Networks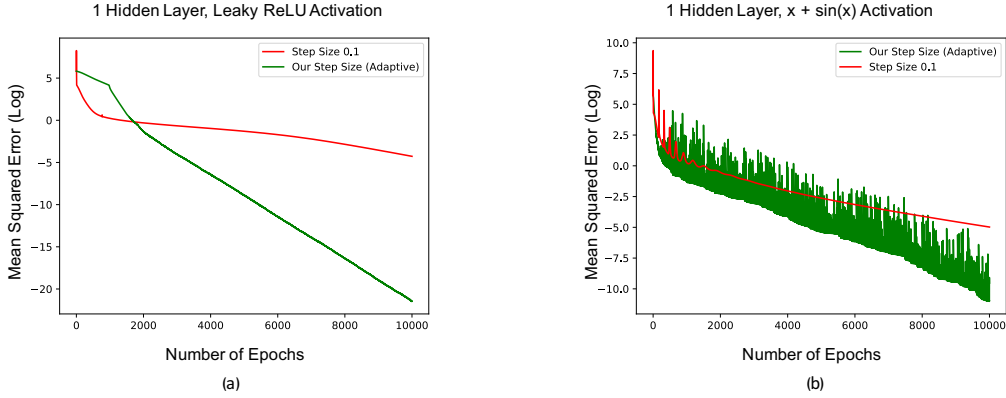

Figure 2: Using the adaptive rate provided by Corollary 1 with  $L$  approximated by  $L^{(t)} = .99 \frac{\|\nabla f(w^{(t)})\|^2}{2f(w^{(t)})}$  leads to convergence for Adagrad in the noisy linear regression setting (60 examples in 50 dimensions with uniform noise applied to the labels). (a) 1 hidden layer network with Leaky ReLU activation Xu et al. (2015) and 100 hidden units. (b) 1 hidden layer network with  $x + \sin(x)$  activation with 100 hidden units. All networks were trained using a single Titan Xp, but can be trained on a laptop as well.
